# Supplementary material for: Technical note: “U–Th Analysis” – open-source software dedicated to MC-ICP-MS U-series data treatment and evaluation
Source: Copernicus journal article supplement (doi:10.5194/gchron-7-1-2025), 2025-01-06
Supplement: Supplementary file 1 [file gchron-7-1-2025-supplement.zip]

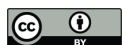

## *Supplement of*

# **Technical note: “U–Th Analysis” – open-source software dedicated to MC-ICP-MS U-series data treatment and evaluation**

**Inga Kristina Kerber et al.**

*Correspondence to:* Norbert Frank ([norbert.frank@iup.uni-heidelberg.de](mailto:norbert.frank@iup.uni-heidelberg.de))

- gchron-7-1-2025-supplement-title-page.pdf
- Supplementary Figures S1 - S4.docx
- Table\_S1.xlsx
- example data for analysis
  - Intensities.xlsx
  - PrBlank.xlsx
  - Ratios.xlsx
  - Ratios\_add.xlsx
  - Results.xlsx
  - Results\_075.xlsx
  - Results\_111.xlsx
  - Results\_237.xlsx
  - Tailing.xlsx
  - blank
    - \* 006Bblk002.exp
    - \* 009Bblk002.exp
    - \* 012Bblk002.exp
    - \* 015Bblk002.exp
    - \* 018Bblk002.exp
    - \* 021Bblk002.exp
    - \* 024Bblk002.exp
    - \* 027Bblk002.exp
    - \* 030Bblk002.exp
    - \* 033Bblk002.exp
    - \* 036Bblk002.exp

- constants - B1\_075.cfg
- constants - B1\_111.cfg
- constants - B1\_237.cfg
- data
  - \* 007B10368.exp
  - \* 010B10650.exp
  - \* 013B10368.exp
  - \* 016B10651.exp
  - \* 019B10368.exp
  - \* 022B10652.exp
  - \* 025B10368.exp
  - \* 028B10653.exp
  - \* 031B10368.exp
  - \* 034B10654.exp
  - \* 037B10368.exp
- hf
  - \* 001Bhf001.exp
  - \* 003Bhf001.exp
  - \* 005Bhf001.exp
  - \* 008Bhf001.exp
  - \* 011Bhf001.exp
  - \* 014Bhf001.exp
  - \* 017Bhf001.exp
  - \* 020Bhf001.exp
  - \* 023Bhf001.exp
  - \* 026Bhf001.exp
  - \* 029Bhf001.exp
  - \* 032Bhf001.exp
  - \* 035Bhf001.exp
- weight protocol 10650-10655; 10668.xlsx
- yhas\_th
  - \* 002ByhasTh.exp
- yhas\_u
  - \* 004ByhasU.exp

The copyright of individual parts of the supplement might differ from the article licence.
