# Supplementary material for: Technical note: “U–Th Analysis” – open-source software dedicated to MC-ICP-MS U-series data treatment and evaluation
Source: Copernicus journal article supplement (doi:10.5194/gchron-7-1-2025), 2025-01-06
Supplement: Supplementary file 1 [file gchron-7-1-2025-supplement.zip]

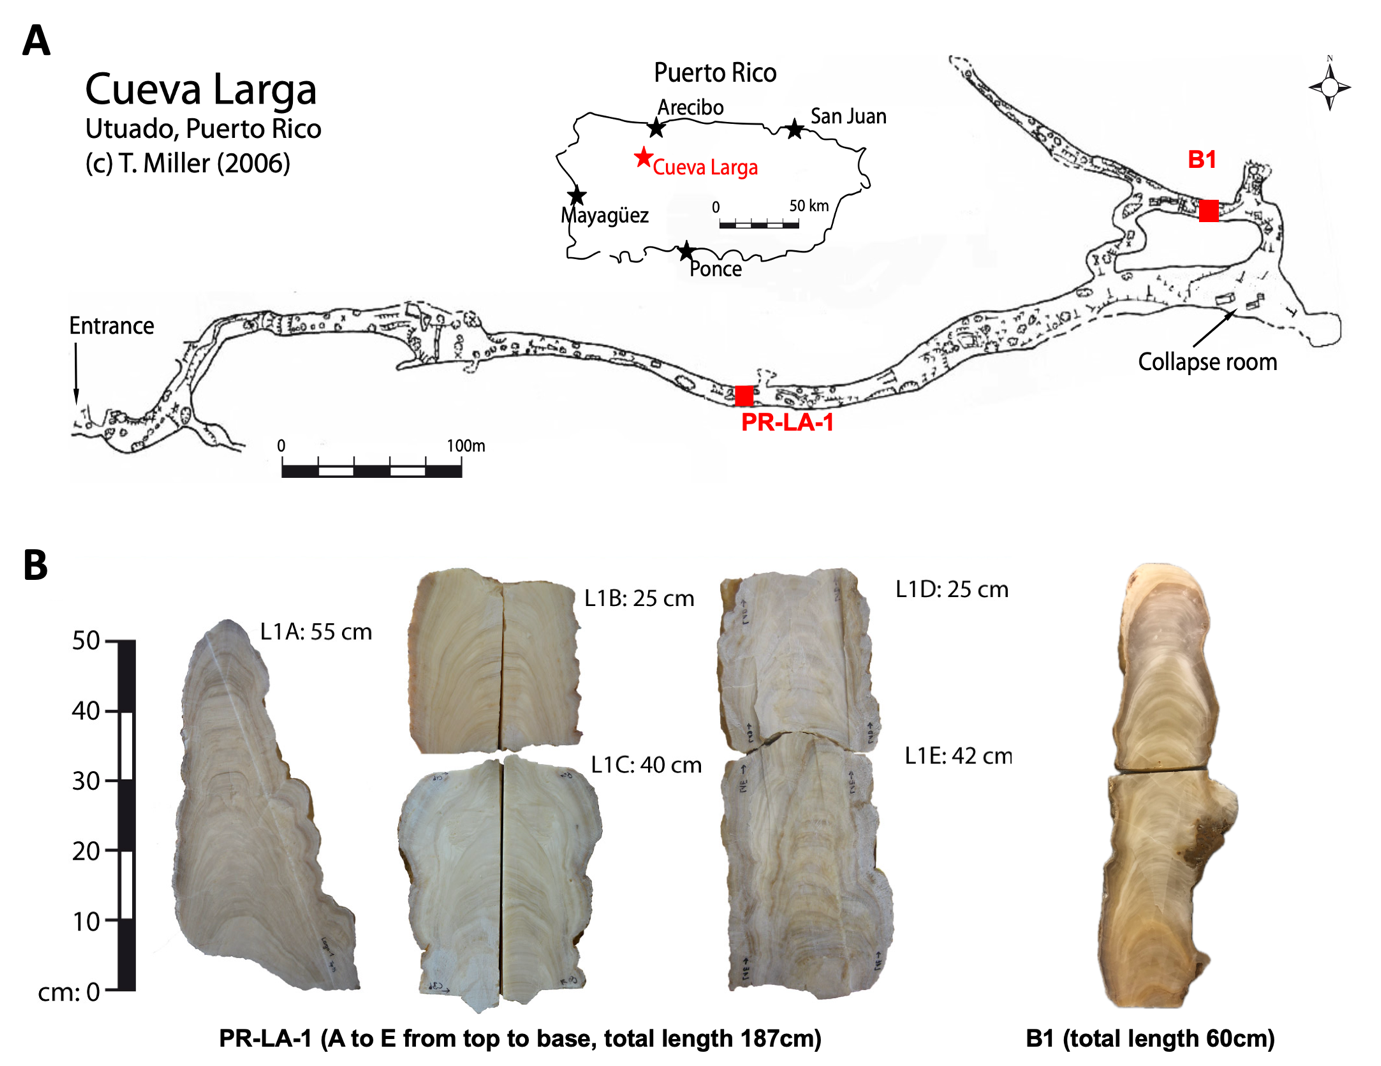


**Figure S1:** Cave and sample information. A) Plan view of Larga Cave with locations of speleothems PR-LA-1 (Warken et al., 2020) and B1 (this study). B) Scans of both speleothems indicating the different sizes and diameters.


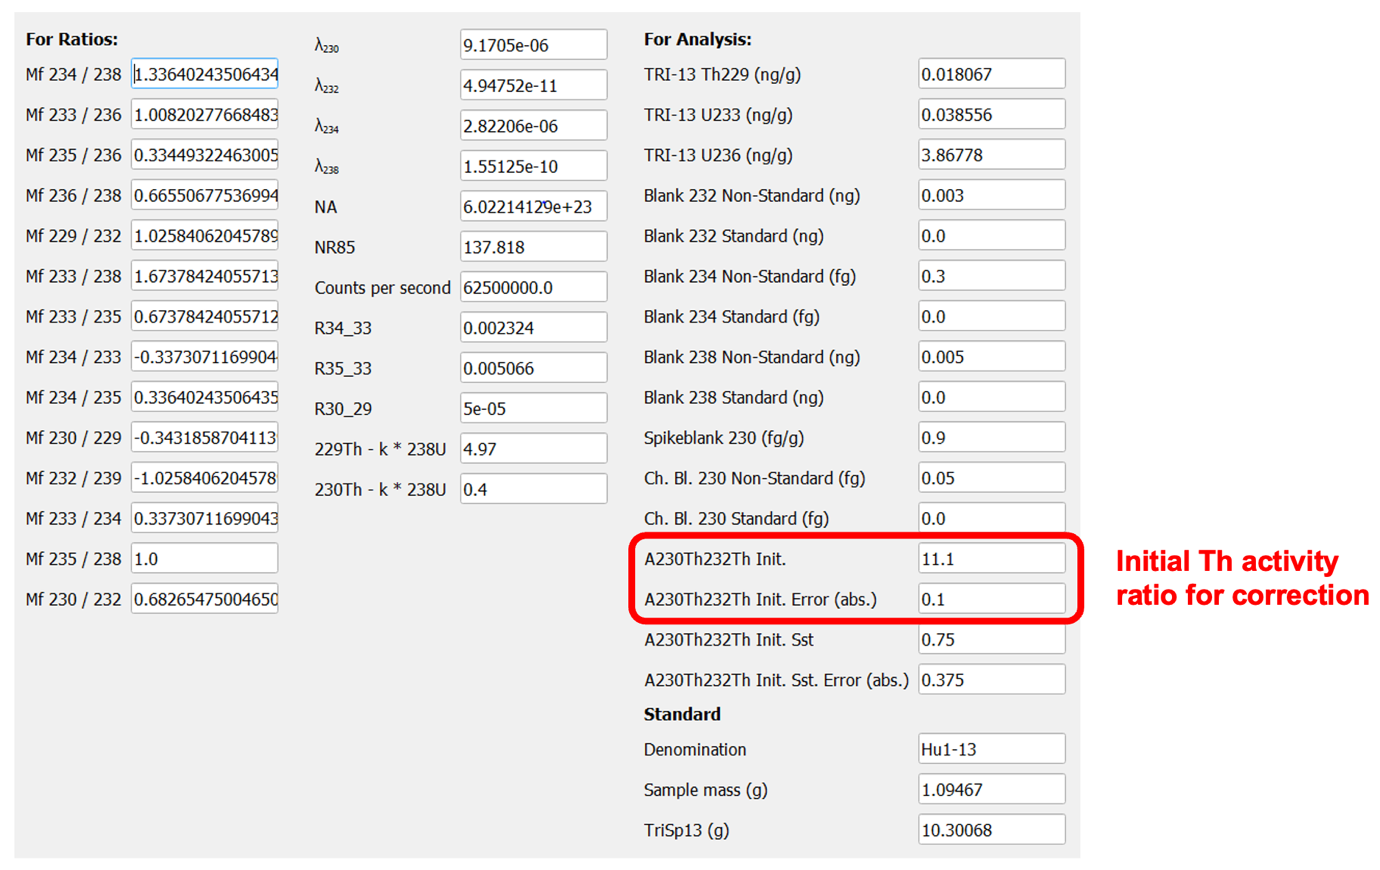


**Figure S2:** Screenshot of the configuration file panel, where changes in relevant constants and correction factors can be implemented.


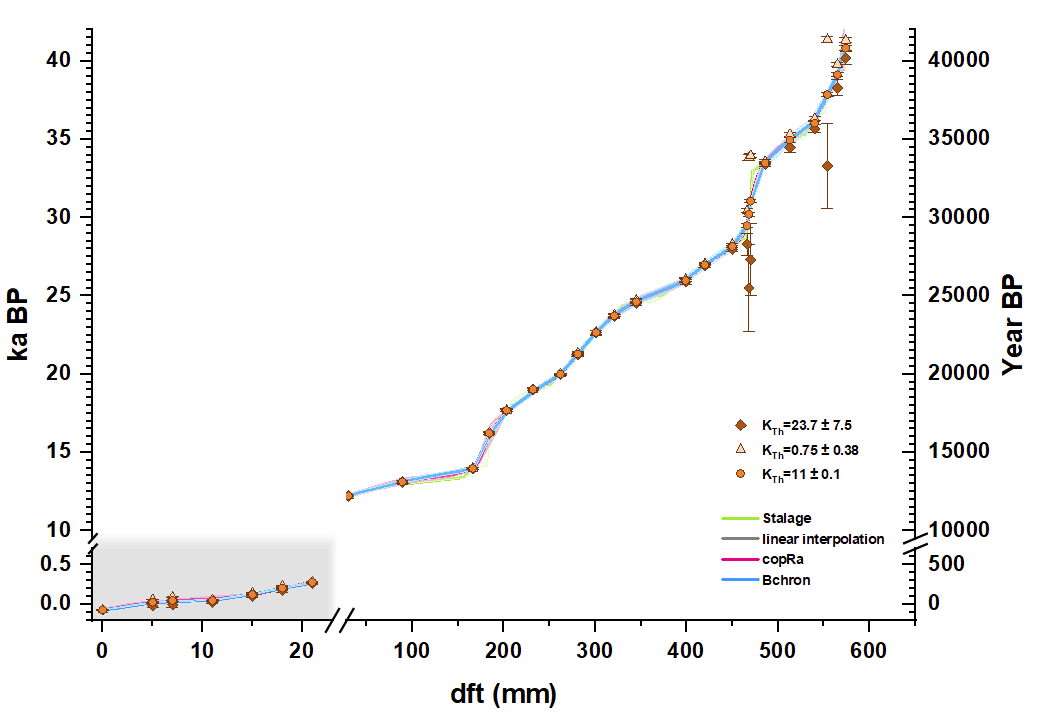


**Figure S3:** 230Th/U ages and different age-depth simulations for stalagmite B1 using linear interpolation, as well as the algorithms StalAge (Scholz and Hoffmann, 2011), CopRa (Breitenbach et al., 2012) and Bchron (Haslett and Parnell, 2008). Note that the axes are split at the position of the growth stop at 23mm dft to visualize the age-depth relationship also during the short growth phase during the latest Holocene after 0.3 ka BP.


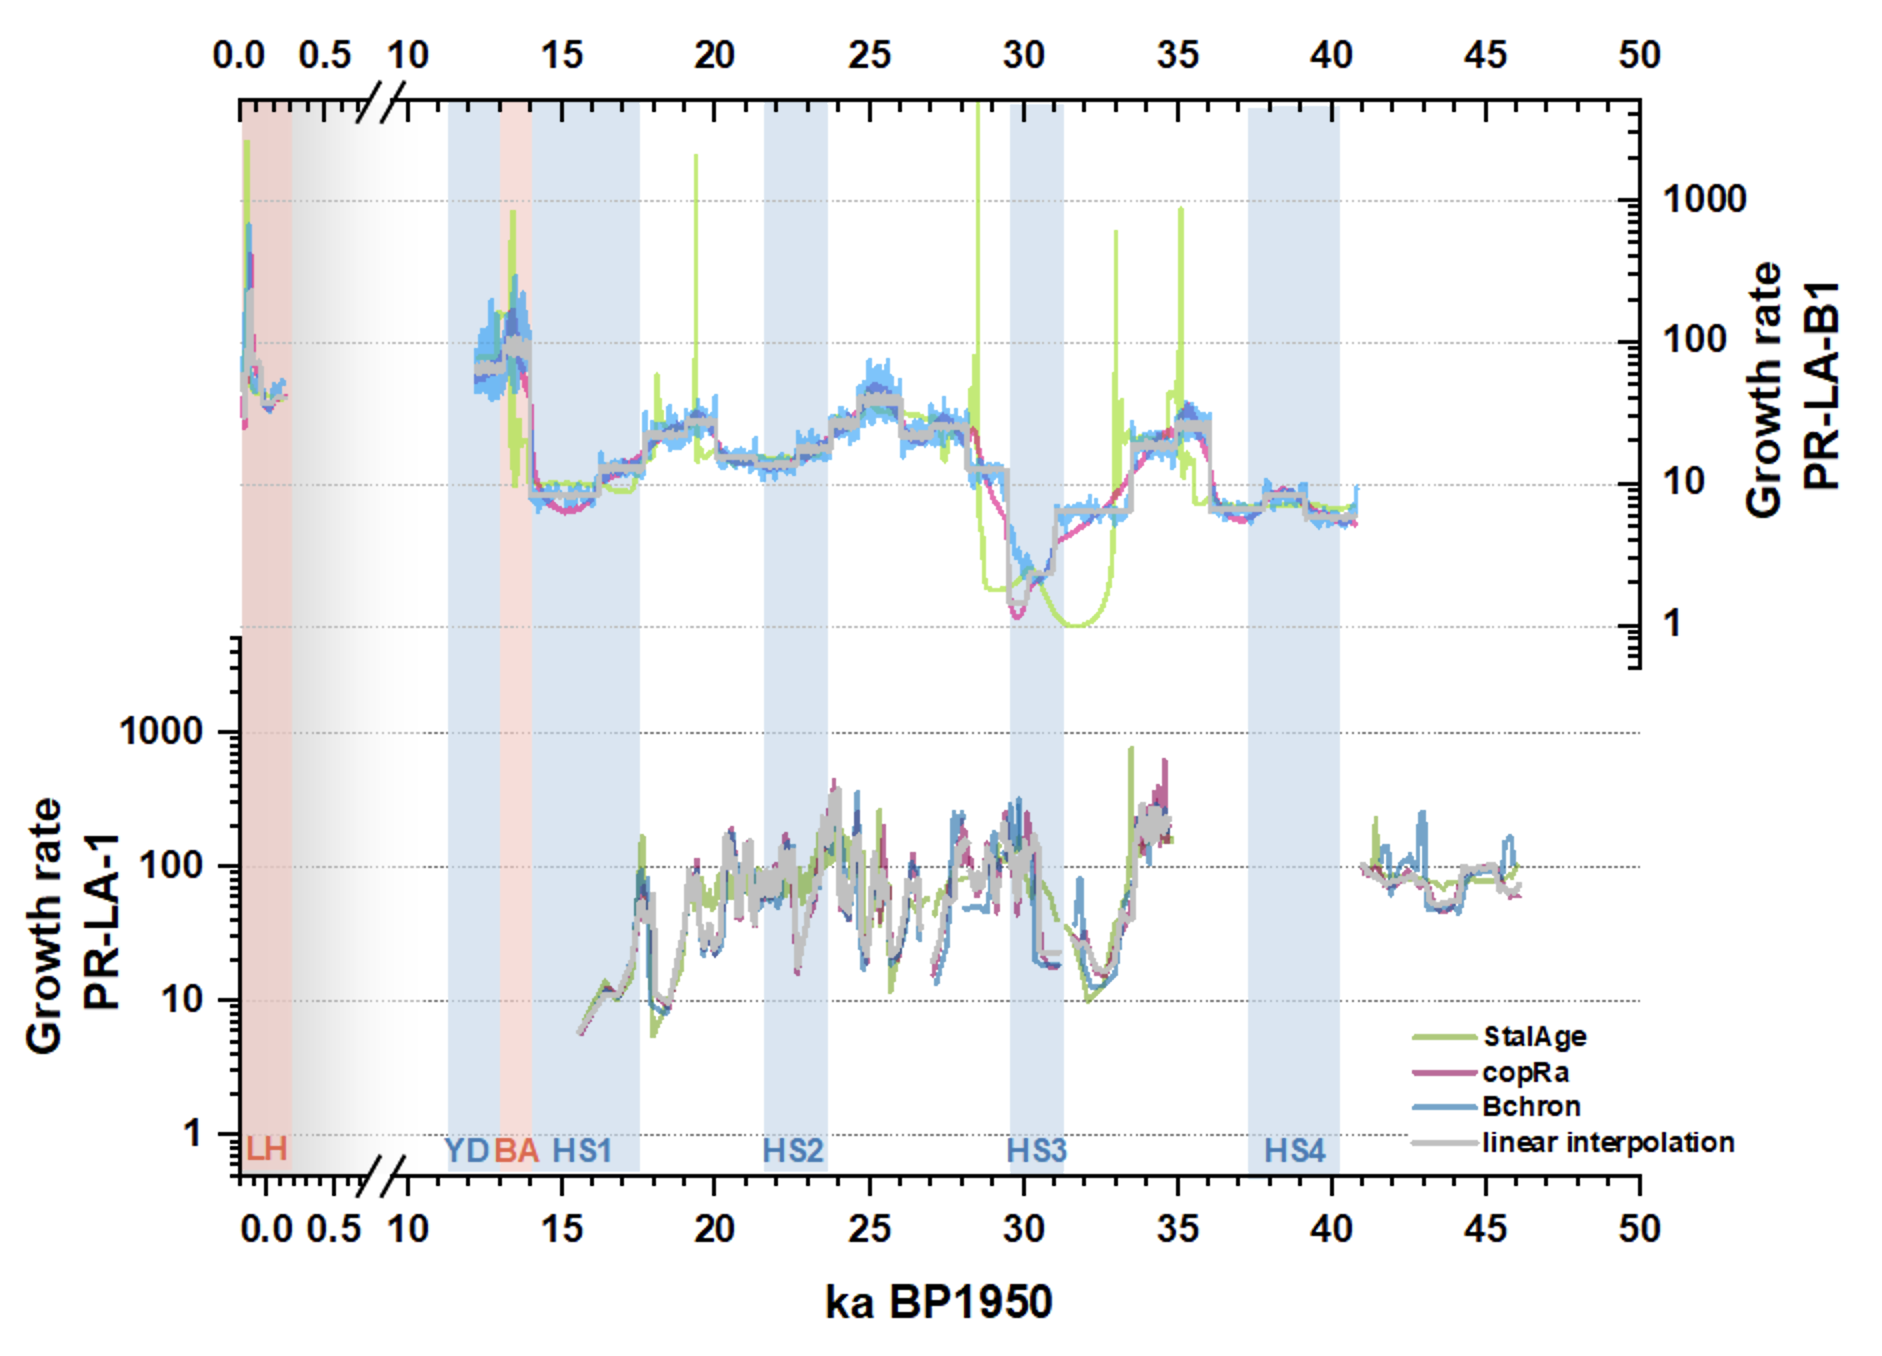


**Figure S4:** Growth rates of speleothems B1 (top panel, this study) and PR-LA-1 (Warken et al., 2020) obtained by linear interpolation, as well as using the algorithms StalAge (Scholz and Hoffmann, 2011), CopRa (Breitenbach et al., 2012) and Bchron (Haslett and Parnell, 2008) as implemented by Roesch and Rehfeld (2020) (code accessed at https://github.com/paleovar/SISAL.AM, codes licensed by the right holder(s) under a GPL-3). Vertical red (blue) bars indicate the timing of warm (cold) phases in Puerto Rico, including the growth phase of B1 during the latest Holocene (0.3 ka BP to present), the Younger Dryas (YD), Bølling/Allerød warming (BA), and Heinrich stadials (HS) 1 to 4
